# Supplementary material for: Patient Preparation for Outpatient Blood Work and the Impact of Surreptitious Fasting on Diagnoses of Diabetes and Prediabetes
Source: PubMed Central journal article supplement — Mayo Clin Proc Innov Qual Outcomes. 2020 Jun 20;4(4):349–56. doi: 10.1016/j.mayocpiqo.2020.04.002 (PMC7411170; doi:10.1016/j.mayocpiqo.2020.04.002), 2020-06-20
Supplement: mmc1.pdf [file mmc1.pdf]

**Supplemental Appendix 1**

Name: \_\_\_\_\_

Date of birth: \_\_\_\_\_

Survey number: \_\_\_\_\_

Fasting Glucose Survey

1. Did you fast for your blood test today?

\_\_\_\_ Yes

\_\_\_\_ No

If yes to #1, why did you fast today? (check all that apply)

\_\_\_\_\_ I always fast for blood tests

\_\_\_\_\_ I was told to fast by my doctor or someone at my doctor's office

\_\_\_\_\_ I called the lab and they told me to fast

\_\_\_\_\_ Other (specify) \_\_\_\_\_

2. Did your doctor or someone at your doctor's office give you instructions on how to fast for your blood tests today?

\_\_\_\_ Yes

\_\_\_\_ No

\_\_\_\_ Not sure

If yes to #2, did you understand the instructions?

\_\_\_\_ Yes

\_\_\_\_ No

If no to #2 and you did fast, how did you know how to fast?

\_\_\_\_\_ I did an internet search on how to fast

\_\_\_\_\_ I already knew how to fast because I have fasted before

\_\_\_\_\_ I called my doctor's office and asked

\_\_\_\_\_ I asked a friend or family member how to fast

\_\_\_\_\_ Other (specify) \_\_\_\_\_

3. If you fast, how long do you fast?

\_\_\_\_ 0-4 hours before my blood test

\_\_\_\_ 5-8 hours before my blood test

Longer than 8 hours before my blood test

It doesn't matter how many hours, I just start fasting at midnight the night before my blood test

Other (specify) \_\_\_\_\_

4. What does fasting mean to you?

I cannot eat or drink anything

I can eat but not drink

I can drink but not eat

I can eat and drink

If you drink when fasting, what do you allow yourself to drink? (check all that apply)

Water

Black coffee

Coffee, with cream or sugar

Tea

Tea, with cream, milk or sugar

Other

5. Do you think it is important to fast before every blood test?

Yes

No

Not sure

6. Do you already have diabetes or prediabetes?

Yes

No

Not sure

If yes to #6, did you take all your diabetes medications as prescribed in the last 24 hours?

Yes

No

I do not take any diabetes medications

7. Did you eat or drink anything, except water, for the past 8 hours?

Yes

No

\_\_\_\_\_ Not sure
